# Supplementary material for: Risk Categorization in On-Farm Welfare in Different-Sized Dairy Sheep Flocks
Source: MDPI journal article supplement (doi:10.3390/ani14101401), 2024-05-07
Supplement: s1 [file s1]

**Table S1.** Main items and specific thresholds for Area A: Farm management and personnel.

| Item                                    | Item description                                                                                                                                                                             |                                                                                                                                                                                                    |                                                                                                                                                                                       |                                                                                                                                  |
|-----------------------------------------|----------------------------------------------------------------------------------------------------------------------------------------------------------------------------------------------|----------------------------------------------------------------------------------------------------------------------------------------------------------------------------------------------------|---------------------------------------------------------------------------------------------------------------------------------------------------------------------------------------|----------------------------------------------------------------------------------------------------------------------------------|
|                                         |                                                                                                                                                                                              | Insufficient                                                                                                                                                                                       | Acceptable                                                                                                                                                                            | Excellent                                                                                                                        |
| A.1 Number of stockpersons              | N of operators involved in the management of the animals                                                                                                                                     | ✓ one for more than 300 animals <sup>1</sup>                                                                                                                                                       | ✓ one for 200-300 animals <sup>1</sup>                                                                                                                                                | ✓ one for less than 200 animals <sup>1</sup>                                                                                     |
|                                         |                                                                                                                                                                                              | ✓ one for more than 150 animals <sup>2</sup>                                                                                                                                                       | ✓ one for 100-150 animals <sup>2</sup>                                                                                                                                                | ✓ one operator for less than 100 animals <sup>2</sup>                                                                            |
|                                         |                                                                                                                                                                                              | ✓ one for more than 100 animals <sup>3</sup>                                                                                                                                                       | ✓ one for 60- 100 animals <sup>3</sup>                                                                                                                                                | ✓ one for less than 60 animals <sup>3</sup> one for less than 100 total animals <sup>4</sup>                                     |
| A.2 Farmer training                     | years of experience and training                                                                                                                                                             | <7 years and no training                                                                                                                                                                           | At least 7 years and no training                                                                                                                                                      | At least 7 years and educational qualification or relevant training within the last 3 years                                      |
| A.3 Management of the groups of animals | For the correct management of the specific needs at least the following categories need to be present: lambs (younger than 3 months), replacement lambs, dry sheep and lactating sheep, rams | Number of groups not corresponding to those expected                                                                                                                                               | Same number of groups as expected                                                                                                                                                     | Multiple groups (i.e. primiparous, pluriparous, early-late lactation) and controlled management of rams                          |
| A.4 Frequency of animal inspection      | Number of daily visits outside of the routine activities (milking and feeding)                                                                                                               | HOUSING: less than one inspection/day<br>PASTURE: inspection at insufficient intervals                                                                                                             | HOUSING: one or more inspections/day without written reports<br>PASTURE: Inspection at sufficient intervals                                                                           | HOUSING/ PASTURE: two or more inspections/day and written reports or computerized logging                                        |
| A.5 Management of sick animals          | Appropriate treatment of sick or injured animals and presence of trained staff                                                                                                               | Untrained personnel and/or animals that need treatment and have not received it and/or the absence of farm veterinarian                                                                            | Trained staff with evidence of animals in the infirmary or treatments in progress and the presence of farm veterinarian                                                               | In addition to the adequacy criteria, the presence of written procedures for the treatment of animals                            |
| A.6 Type of handling                    | Correct handling to send the animals for milking or to change the grazing area                                                                                                               | Use of potentially harmful tools (electric prods and/or sharp instruments)                                                                                                                         | Use of non-injurious tools (voice, hands and/or flexible plastic rods)                                                                                                                | na                                                                                                                               |
| A.7 Management of feed and daily ration | Presence of specific rations for dry ewes, replacement, lactation and rams                                                                                                                   | HOUSED: i.e. empirical ration or composed of unhealthy foods<br>PASTURE: i.e. no grazing techniques and no additional integration                                                                  | HOUSED: i.e. specific ration for each group<br>PASTURE: i.e. diet based on rotational grazing and food supplementation in certain periods                                             | HOUSED: i.e. ration calculated by a nutritionist<br>PASTURE: i.e. controlled management of grazing times and herbaceous essences |
| A.8 Management of lambs until weaning   |                                                                                                                                                                                              | ✓ Lamb removed from its mother<br>✓ fed with milk substitute at a unsuitable temperature<br>✓ in case of automatic lamb feeder in operation for more than 24 hours=1 teat for more than 25 animals | ✓ Lamb removed from its mother<br>✓ fed with milk substitute at a suitable temperature twice a day<br>✓ in case of automatic lamb feeder in operation for 24 hours =1 teat 25 animals | Lamb kept with its mother until weaning                                                                                          |

|                                    |                                                                    |                                                                          |                                                                                     |                                                                                                                                 |
|------------------------------------|--------------------------------------------------------------------|--------------------------------------------------------------------------|-------------------------------------------------------------------------------------|---------------------------------------------------------------------------------------------------------------------------------|
| A.9 Water availability             | HOUSED Absence of drinking water or rationed water                 |                                                                          | HOUSED functioning drinkers in all groups, in sufficient numbers and clean water    | Ad libitum water for all animals and water given (in addition to the milk at least once a day) also to the lambs before weaning |
|                                    | PASTURE: excessive distance between water sources, unhealthy water |                                                                          | PASTURE: functioning drinkers in all groups, near grazing areas, or mobile drinkers |                                                                                                                                 |
| A.10 Cleanliness of drinkers       | Dirt on the surface and on the walls of the drinkers               |                                                                          | Food residues only on the surface                                                   | Clean drinkers and clear water                                                                                                  |
| A.11 Hygiene of housing            | Cleaning and management of housing environments and litter         | Dirty, unmanaged and/or harmful to the animals housing and bedding areas | Fairly clean and sufficiently managed housing and litter areas                      | Clean and dry housing and bedding environments, optimally managed                                                               |
| A.12 Hygiene of milking operations | Udder hygiene                                                      | Lack of udder hygiene                                                    | Adequate cleaning of the udder, use of non-routinely pre/post dipping               | Adequate cleaning of the udder, routine use of pre/post dipping with sprays or clean glasses                                    |

<sup>1</sup>the milking is performed by others; <sup>2</sup>the same person also performs the milking; <sup>3</sup>the same person also performs hand milking; <sup>4</sup>if the same person also performs the milking; na=not applicable.

**Table S2.** Main items and specific thresholds for Area B: Structures and facilities.

| Item                                          | Item description                                                    | Insufficient                                                                                 | Acceptable                                                                                                                                                        | Excellent                                                                                                                                                                                         |
|-----------------------------------------------|---------------------------------------------------------------------|----------------------------------------------------------------------------------------------|-------------------------------------------------------------------------------------------------------------------------------------------------------------------|---------------------------------------------------------------------------------------------------------------------------------------------------------------------------------------------------|
| B.14 Farm buildings                           | Harmfulness to animals of housing areas, environments or equipment  | harmful                                                                                      | not harmful                                                                                                                                                       | na                                                                                                                                                                                                |
| B.15 Presence of shelter on the pasture       |                                                                     | Absence, insufficiency or inadequate shelters                                                | Sufficient and adequate shelters for all animals                                                                                                                  | Easily accessible artificial shelters, sufficient and suitable for protection from environment                                                                                                    |
| B.16 Type of animal housing                   |                                                                     | Conventional barns, kept tight for a group of animals                                        | Loose housing for all groups of animals                                                                                                                           | Loose housing for all animals and possibility for adult sheep to access an exercise area with a surface area of at least 1.7 m <sup>2</sup> /head                                                 |
| B.17 Surface for decubitus                    | Freedom of movement Surface available for adult sheep               | Limited: surface area of less than 1.5 m <sup>2</sup> /head                                  | Ensured: a surface of between 1.5 - 1.7 m <sup>2</sup> /head                                                                                                      | Free-range animals with an available area exceeding 1.7 m <sup>2</sup> /head as well as the possibility of accessing a suitable exercise or grazing area                                          |
| B.18 Number of places available in the feeder | Access to food for adult sheep                                      | places in the feeding trough or unitary front with spaces smaller than the number of animals | places in the feeding trough or unitary front with spaces equal to the number of animals                                                                          | places in the feeding trough or unitary front with spaces greater than the number of animals or suitable pasture                                                                                  |
| B.19 Size and operation of drinkers           |                                                                     | less than 1 drinker every 25 heads                                                           | 1 drinker every 25 heads                                                                                                                                          | More than 1 drinker every 25 heads and with diversified locations in each area of the farm                                                                                                        |
| B. 20 Infirmary                               | Presence of a room in which injured or sick animals can be isolated | Absence                                                                                      | Specific room equipped, where appropriate, with dry and comfortable litter                                                                                        | Loose animals in a specific and identified room, with dry and comfortable permanent litter with suitable dimensions (able to accommodate 3% of the average number of animals present in the farm) |
| B.21 Milking system maintenance               | Periodic checks of milking system                                   | Absence of scheduled maintenance                                                             | Not well-executed periodic checks, specialized maintenance only in case of breakdowns and no documentation certifying periodic maintenance                        | Scheduled maintenance, periodic checks and availability of a written records                                                                                                                      |
| B.22 Temperature and humidity                 | Microclimatic conditions                                            | Harmful: i.e. closed or dusty environments or semi-open stables without adequate ventilation | Suitable: i.e. natural ventilation (open barn) or suitable ventilation/ventilation systems or the possibility of modulating the openings according to the climate | Optimal: i.e. conditioning systems with insulation systems                                                                                                                                        |
| B.23 Artificial lighting                      | Natural or artificial                                               | Insufficient                                                                                 | Adequate natural or artificial lighting for at least 8 hours/day                                                                                                  | na                                                                                                                                                                                                |

na=not applicable.

**Table S3.** Main items and specific thresholds for Area C: Animal-based measures.

| Item                                                            | Item description                                                                                                                                                        | Insufficient                                                        | Acceptable                                                            | Excellent                               |
|-----------------------------------------------------------------|-------------------------------------------------------------------------------------------------------------------------------------------------------------------------|---------------------------------------------------------------------|-----------------------------------------------------------------------|-----------------------------------------|
| C.24 Relationship test between humans and animals (adult sheep) |                                                                                                                                                                         | The animals leave when the farmer arrives                           | The animals remain still or approach the farmer upon arrival          | na                                      |
| C.25 Withdrawal from the social group                           | % of isolated animals                                                                                                                                                   | More than 3%                                                        | Between 1-3%                                                          | Less than 1%                            |
| C.26 Nutrition status (adult sheep)                             | % of the animal with BCS beyond the accepted limits: less than 2 (very lean animals) and greater than 4 (very fat animals)                                              | More than 10% over the limits                                       | Between 5 and 10% over the limits                                     | Less than 5% over the limits            |
| C.27 Cleanness of animals                                       | State of cleanliness of the fleece (neck, abdomen, udder, limbs and tail)<br>% of dirty animals                                                                         | More than 20%                                                       | Between 7% and 20%                                                    | Less than 7%                            |
| C.28 Skin lesions                                               | % of animals with skin lesions                                                                                                                                          | More than 10% of animals                                            | Between 5% and 10%                                                    | Less than 5%                            |
| C.29 Prevalence of lameness (adult sheep)                       | % of animal lame                                                                                                                                                        | More than 10%                                                       | Between 6% and 10%                                                    | Less than 6%                            |
| C.30 Udder health                                               | Geometric mean of somatic cell counts                                                                                                                                   | greater than 1,500,000 cells/ml and/or no data in the last 3 months | between 750,000 and 1,500,000 cells/ml                                | less than 750,000 cells/ml              |
| C.31 Annual mortality of adult sheep                            | Number of sheep that died spontaneously, emergency slaughtered, euthanized in the last 12 months compared to the number of adult sheep present on the day of the visit  | More than 5%                                                        | Between 2% and 5%                                                     | Less than 2%                            |
| C.32 Annual lamb mortalities                                    | Number of lambs that died from the 2nd to the 90th day of life, excluding stillbirths, compared to the total number of lambs born alive and viable in the last 12 month | More than 10%                                                       | Between 4 and 10%                                                     | less than 4%                            |
| C.33 Mutilations                                                | incisions or with mutilations/castrations                                                                                                                               | without respecting the times and methods established by law         | performed in compliance with the times and methods established by law | no incisions or mutilations/castrations |

na=not applicable.

**Table S4.** Main items and specific thresholds for Area D: Emergency plan and alert system

| Item                                                  | Item description                                                                                                                                                                                                                                                                |                                               |                                                                                     |                                                                              |
|-------------------------------------------------------|---------------------------------------------------------------------------------------------------------------------------------------------------------------------------------------------------------------------------------------------------------------------------------|-----------------------------------------------|-------------------------------------------------------------------------------------|------------------------------------------------------------------------------|
|                                                       |                                                                                                                                                                                                                                                                                 | Insufficient                                  | Acceptable                                                                          | Excellent                                                                    |
| D.34 Origin of the drinking water                     | Number of sources of water (well, natural source or aqueduct), presence of cistern                                                                                                                                                                                              | Only from one source                          | From an aqueduct or well with a large cistern with sufficient water for a few hours | Multiple sources                                                             |
| D.35 Lighting                                         | Artificial lighting for inspection                                                                                                                                                                                                                                              | Absent                                        | Correct and functioning artificial lighting                                         | na                                                                           |
| D.36 Fire alarm (or prevention systems)               | Fire alarm or prevention systems                                                                                                                                                                                                                                                | Absent                                        | Present                                                                             | na                                                                           |
| D.37 Inspection of automatic and mechanical equipment | Every automatic or mechanical plant essential for animal health (i.e. milking machine) must be inspected once a day and any defects found eliminated immediately.<br>Adequate measures must be taken to safeguard the health and welfare of the animals (i.e. power generator)" | Lack inspections or of timely interventions   | At least one inspection per day                                                     | Procedures or good practice manuals with operating instructions, and records |
| D.38 Treatment register                               | Maintenance of the register                                                                                                                                                                                                                                                     | Absent or non-compliant                       | Present and compliant                                                               | na                                                                           |
| D.39 Register of loading and unloading of animals     | Maintenance of the register                                                                                                                                                                                                                                                     | Absent or non-compliant, o abnormal mortality | Present and compliant                                                               | na                                                                           |
| D.40 Administration of illicit substances             |                                                                                                                                                                                                                                                                                 | Non-compliant                                 | Compliant                                                                           | na                                                                           |

na=not applicable.

**Table S5.** Main items and specific thresholds for Area BIO: Biosecurity.

| Item                                                                     | Item description                                                                                                                 | Insufficient                                                             | Acceptable                                                                                                             | Excellent                                                                                                                                    |
|--------------------------------------------------------------------------|----------------------------------------------------------------------------------------------------------------------------------|--------------------------------------------------------------------------|------------------------------------------------------------------------------------------------------------------------|----------------------------------------------------------------------------------------------------------------------------------------------|
| BIO.1 Control plan for rats and flies                                    | Presence of procedures and control plans                                                                                         | No procedures                                                            | Non-formalized procedures                                                                                              | written procedures and/or biosafety manual                                                                                                   |
| BIO.2 Contact with other animal species                                  | Frequency of contact with other animal species                                                                                   | Frequent and obvious                                                     | Possible but it is not evident                                                                                         | Contact cannot occur. The farm is well protected (fences, etc.); there are no other species of animals within the farm perimeter             |
| BIO.3 General precautions for unknown visitors                           | Presence of precautions procedures for unknown visitors                                                                          | No procedures                                                            | Non-formalized procedures                                                                                              | Procedures and/or written in a biosafety manual                                                                                              |
| BIO.4 Management of regular visitors                                     | Precautions regarding the clothing                                                                                               | No precautions                                                           | All "visitors" must wear disposable shoes before entering the stables                                                  | All "visitors" must pass through a changing room area and must wear disposable socks and gowns                                               |
| BIO.5 Disinfection of vehicles upon entering the farm                    | Presence of disinfection aids/devices                                                                                            | Absence                                                                  | Non-specific disinfection aids used only in case of need                                                               | Specific, fixed and routinely used disinfection aids                                                                                         |
| BIO.6 Possibility of contact between foreign vehicles and reared animals |                                                                                                                                  | Yes                                                                      | No                                                                                                                     | na                                                                                                                                           |
| BIO.7 Collection of carcasses-                                           | The vehicle for the collection of dead animals cross areas that allow contact (< 20 m) with areas where there are reared animals | Yes                                                                      | No, the vehicle is blocked at the confines of the farm, where the carcass/s was/were previously collected              | na                                                                                                                                           |
| BIO.8 Loading of live animals                                            | Loading of live animals close or far from the stables where the animals are reared                                               | Close to the stables (<20 m)                                             | Away from the stables (>20 m)                                                                                          | na                                                                                                                                           |
| BIO.9 Animal movement                                                    | Frequency of incoming and outgoing animals                                                                                       | Routine outcoming animals (exhibitions/markets/pasture with other herds) | Purchase/incoming only in case of emergency or need (in the last 2 years) and no movement of animals                   | No incoming and no handling of animals for over 2 years                                                                                      |
| BIO.10 Quarantine / settlement management                                | Quarantine, times structures, and biological tests on the animals purchased                                                      | No form of quarantine                                                    | Partial quarantine, carried out in an empirical way (dedicated area adjacent to the rest of the animals / short times) | No incoming of animals for over 2 years, or correct form of quarantine, in terms of times and structures and completed with biological tests |

|                                                               |                                                                                                                                                                                                                  |                                                                 |                                                                     |                                                                                                                                                                                          |
|---------------------------------------------------------------|------------------------------------------------------------------------------------------------------------------------------------------------------------------------------------------------------------------|-----------------------------------------------------------------|---------------------------------------------------------------------|------------------------------------------------------------------------------------------------------------------------------------------------------------------------------------------|
| BIO.11 Control and prevention of the main infectious diseases | Knowledge, presence of control and prevention plans (vaccination, elimination of infected animals, eradication plans, etc.) of paratuberculosis; MAEDI VISNA virus; contagious ovine digital dermatitis          | No knowledge or no information on the health status of the herd | Partial knowledge and/or presence of undefined plans                | ✓ Knowledge of the 3 pathologies and of the relative situation / prevalence on the farm<br>✓ application of correct operational plans on at least 2 of them,<br>✓ prevention and control |
| BIO.12 Health monitoring activities-                          | Farm's habit of delivering biological and/or pathological material (i.e. faeces, nasal mucus, saliva, blood samples, fetuses, etc.) to the laboratory of reference analysis for health investigations/monitoring | Absence                                                         | Evidences of analytical result of the last 12 months                | na                                                                                                                                                                                       |
| BIO.13 Control and prevention of udder infections-            | Microbiological analytical results (in the last 12 months) on bulk milk or individual animal, such as to indicate the risk of mastitis                                                                           | Absence                                                         | Only bulk analyses                                                  | Analyses of problematic animals and eradication or control plans                                                                                                                         |
| BIO.14 Control and prevention of endo / ectoparasitosis       | Knowledge of the health status and prevention /control plans                                                                                                                                                     | Absence                                                         | Partial knowledge and/or presence of undefined plans                | Knowledge of the main parasitosis; antiparasitic treatments planned and/or performed following laboratory tests                                                                          |
| BIO.15 Control and analysis of water sources                  |                                                                                                                                                                                                                  | No well water analysis                                          | Well water analyses at least once a year / municipal aqueduct water | na                                                                                                                                                                                       |

na=not applicable.
